# Supplementary material
Source: publisher figshare collection journal article supplement (https://sage.figshare.com/ndownloader/files/15051248)
Supplement: Supplementary file 1 [file 15051248]

## Appendix A - Questionnaire (Dutch & English)

1. Waar(van) en wanneer hebt u geleerd wat 'het internet' eigenlijk is?  
Where and when did you first hear of 'the phenomenon Internet'?  
.....  
.....  
.....
2. Denk aan de eerste keer dat u internet gebruikte: waarvoor gebruikte u het toen?  
Think about the first time you used the Internet, what did you use it for?  
.....  
.....  
.....
3. Wat was de reden dat u internet aanschafte?  
What was the reason you purchased an Internet connection?  
.....  
.....  
.....
4. Van wie heeft u geleerd om met internet om te gaan?  
How (of whom) did you learn how to use the Internet?  
.....  
.....  
.....
5. Heeft u ooit cursussen of workshops gevolgd om (apparaten met) internet te leren gebruiken? Zo ja, welke?  
O Yes, namely: .....  
.....  
.....  
O No
6. Did you ever follow courses or workshops to learn how to use the Internet and its corresponding devices? If so, which ones?  
O Yes, namely: .....  
.....  
.....  
O No
7. Waarvoor gebruikt u internet nu zoal? Probeer zo volledig mogelijk te zijn, het is mogelijk meerdere doeleinden te benoemen.  
For which purposes do you use the Internet nowadays? Try to answer as complete as possible, you can fill out several purposes.

- .....  
.....  
.....
8. Hoe goed bent u met het internet op een schaal van 1-10?  
How would you grad your Internet skills on a a scale of 1-10?
- |                       |                       |                       |                       |                       |                       |                       |                       |                       |                       |
|-----------------------|-----------------------|-----------------------|-----------------------|-----------------------|-----------------------|-----------------------|-----------------------|-----------------------|-----------------------|
| 1                     | 2                     | 3                     | 4                     | 5                     | 6                     | 7                     | 8                     | 9                     | 10                    |
| <input type="radio"/> |
9. Wat was het allereerste apparaat met internet dat u gebruikte?  
What was the first device with Internet that you used?
- ☐ Personal computer (PC)  
☐ Laptop  
☐ Tablet  
☐ Smartphone  
☐ Other, namely: .....
10. Welke van de volgende apparaten met internet heeft u wel eens gebruikt?  
Which of the following devices have you ever used?
- ☐ Personal computer (PC)  
☐ Laptop  
☐ Tablet  
☐ Smartphone  
☐ Other, namely: .....
11. Welke van de hiervoor genoemde apparaten gebruikt u nog steeds?  
Which of the aforementioned devices do you still use?
- ☐ Personal computer (PC)  
☐ Laptop  
☐ Tablet  
☐ Smartphone  
☐ Other, namely: .....
12. Gebruikt u (enkele van deze) apparaten nu voor andere dingen dan voorheen?  
Do you now use (some of) these devices for other purposes than before?
- ☐ Yes  
☐ No, the functionalities of all devices have stayed the same
13. Zijn er apparaten met internet die u in de toekomst nog wilt kopen?  
Are there any devices with Internet you would like to buy in the future?
- ☐ Yes, namely:.....  
☐ No
14. Vindt u het belangrijk om altijd de laatste versie van een apparaat te hebben?  
Do you think it is important to always have the newest version of a device?

☐ Yes

☐ No

15. Wie bepaalt er thuis meestal of er een nieuw apparaat wordt gekocht?

Who makes the decision to buy a new device?

☐ Me

☐ My partner

☐ My partner and me, in consultation

16. Op welke momenten van de dag gebruikt u internet? Probeer zo volledig mogelijk te zijn, noteer alle momenten die in u opkomen.

At which moments during the day do you use the Internet? Try to be as complete as possible, fill out all moments that come to mind.

.....  
.....  
.....

17. Wat zou u zonder internet niet meer kunnen doen?

Describe what you would be unable to do without the Internet.

.....  
.....  
.....

18. Is internet ook belangrijk voor de invulling van uw vrije tijd?

Is the Internet of importance for your spare time?

☐ Yes

☐ No, not at all

19. Op welke manier gebruikt u internet voor de invulling van uw vrije tijd?

How do you use the Internet in your spare time?

.....  
.....  
.....

20. Waar in huis maakt u gebruik van internet? Benoem deze plekken.

Where in the house do you use the Internet?

.....  
.....  
.....

21. Zijn er ook apparaten die u wel eens buitenshuis gebruikt (met uitzondering van mobiele telefoon)? Zo ja, welke zijn dat?

Are there devices you use outside of the house (with the exception of the smartphone)? If so, which ones?

O Yes, the following device(s):.....

O No

22. Gebruikt u internet ook wel eens in het openbaar, dus buiten het huis of de werkplek?

Do you use the Internet in publicly, so outside the home or working place?

O Yes

O No, never

23. Praat u wel eens met anderen over uw internetgebruik?

Do you talk about other about your Internet use sometimes?

O Yes

O No, never

24. Zijn er thuis regels voor het internetten?

Are there any rules at home concerning Internet use?

O Yes

O No, not a single one

25. Beïnvloedt internet het contact tussen gezinsleden?

Does the Internet influence interaction between family members?

O Ja

O Nee

26. Helpen jullie elkaar binnen het gezin wel eens met internet?

Do you help each other within the family with Internet use (at home)?

O Ja

O Nee

27. Krijgt u wel eens hulp van buitenaf (niet-gezinsleden) bij het gebruik van internet?

Do you get help from the outside (non-family members) sometimes?

O Ja

O Nee

28. Wat is internet voor u?

What does the Internet mean to you?

.....  
.....  
.....

29. Is het voor u vanzelfsprekend om internet te gebruiken?

Is it a matter of course for you to use the Internet?

O Yes

O No

30. Stel, internet werkt niet meer, zou u dan een probleem hebben?

Imagine, the Internet doesn't work anymore. Would you have a problem?

O Ja

O Nee

31. Welke websites bezoekt u regelmatig?

Which websites do you visit regularly?

[illegible]

Welke apps gebruikt u regelmatig?

Which apps do you use regularly?

This image shows a full page of a handwriting practice worksheet. It consists of multiple horizontal rows, each defined by two parallel dashed lines. The rows are evenly spaced and extend across the entire width of the page, providing a guide for letter height and placement. There is no text or other markings on the page.

## Appendix B – Coding scheme

| Appropriation (A) |                                           |                                                                                                                                                                                                                                                                                                                                                                                                                         |               |
|-------------------|-------------------------------------------|-------------------------------------------------------------------------------------------------------------------------------------------------------------------------------------------------------------------------------------------------------------------------------------------------------------------------------------------------------------------------------------------------------------------------|---------------|
| AA                | Getting to know the phenonemon 'internet' | <ol style="list-style-type: none"> <li>1. Partner, children or parents talked about it at home</li> <li>2. Spoken about at work or school</li> <li>3. Acquaintances/friends talked about it outside of the home</li> <li>4. Generally known (f.e. through media)</li> <li>5. At a computer club or course</li> </ol>                                                                                                    | Appropriation |
| AB                | Purpose first time Internet use           | <ol style="list-style-type: none"> <li>1. To search information</li> <li>2. Gaming</li> <li>3. School</li> <li>4. Wandering on the Intenret out of curiosity</li> <li>5. E-mailing</li> <li>6. Work related</li> <li>7. Downloading music</li> <li>8. Telebanking</li> <li>9. Chatting (BBS, ICQ, MSN)</li> <li>10. Organize association activities</li> <li>11. Watch movies</li> <li>12. Build own website</li> </ol> | Appropriation |
| AC                | Place first time Internet use             | <ol style="list-style-type: none"> <li>1. At home</li> <li>2. At work</li> <li>3. At a friend's home</li> <li>4. At a course location</li> <li>5. At the computer club</li> <li>6. At school/university</li> </ol>                                                                                                                                                                                                      | Appropriation |
| AD                | Reason purchase Internet connection       | <ol style="list-style-type: none"> <li>1. To keep up with the times (feeling of obligation)</li> <li>2. Business purposes</li> <li>3. For the children (school)</li> <li>4. Curiousness, interest</li> <li>5. Not targeted, was part of deal</li> <li>6. At the assistance of acquaintances</li> <li>7. Convenience (to be able to use it at home)</li> </ol>                                                           | Appropriation |

|    |                                  |                                                                                                                                                                                                                                                                                                                                                                                                                                                                                                                                                                                                                                                                          |               |
|----|----------------------------------|--------------------------------------------------------------------------------------------------------------------------------------------------------------------------------------------------------------------------------------------------------------------------------------------------------------------------------------------------------------------------------------------------------------------------------------------------------------------------------------------------------------------------------------------------------------------------------------------------------------------------------------------------------------------------|---------------|
|    |                                  | 8. Parents purchased it                                                                                                                                                                                                                                                                                                                                                                                                                                                                                                                                                                                                                                                  |               |
| AE | Learned to use the Internet from | 1. Myself<br>2. Partner<br>3. Children<br>4. Friends/family<br>5. Siblings<br>6. At work (colleagues)<br>7. At school<br>8. Parents<br>9. Computer club<br>10. From the books                                                                                                                                                                                                                                                                                                                                                                                                                                                                                            | Appropriation |
| AF | Courses or workshops             | 1. Course at work<br>2. Excel and/or Word<br>3. Rabobank course<br>4. MS-Dos course<br>5. None, no need to<br>6. None, too expensive<br>7. General (Windows) course                                                                                                                                                                                                                                                                                                                                                                                                                                                                                                      | Appropriation |
| AG | Current Internet use types       | 1. Social media<br>2. E-mailing<br>3. Work related<br>4. Education related<br>5. Searching information<br>6. Gaming<br>7. Navigation<br>8. Rain radar/weather forecast<br>9. Online banking<br>10. Tax return<br>11. Maintaining contacts<br>12. Making new contacts<br>13. Communication with school<br>14. Music/radio<br>15. Television, movies, series<br>16. Online shopping<br>17. Online storage<br>18. Agenda/appointments<br>19. Administrative<br>20. Manage webshop<br>21. Advertising<br>22. Movement tracking<br>23. Reading books<br>24. News<br>25. Searching for (offline) activities<br>26. Selling (second hand) products<br>27. Interest groups/pages | Appropriation |

|    |                       |                                                                                                                                                                                                                                                                                                                                                                                                                                                                                                                                                                                                                                     |                                                          |
|----|-----------------------|-------------------------------------------------------------------------------------------------------------------------------------------------------------------------------------------------------------------------------------------------------------------------------------------------------------------------------------------------------------------------------------------------------------------------------------------------------------------------------------------------------------------------------------------------------------------------------------------------------------------------------------|----------------------------------------------------------|
|    |                       | 28. Searching for receipes<br>29. Listening religious worship<br>30. Organize activities<br>(associations)<br>31. Online dating<br>32. Trading<br>33. Making radio<br>34. Signing petitions<br>35. Administrative tasks<br>income (income<br>supplements etc.)<br>36. Google Earth<br>37. Online savings program<br>38. Trip planner<br>39. Applying for job(s)<br>40. Chatting<br>41. Surveys/panels<br>42. Video's uploading<br>podcasts<br>43. Investments, stock market<br>44. Sport news/results/reports<br>45. Tutorials/online manuals<br>46. Househunting<br>47. Seeking inspiration<br>48. Travel guides                   |                                                          |
| AH | Benefits Internet use | 1. Convenience (not having<br>to get out of the house,<br>ease)<br>2. Financial benefits, make<br>comparisons<br>3. Broader range<br>4. Findability of products<br>5. Maintaining social contact<br>(at a distance)<br>6. Time savings<br>7. Orderliness<br>reviews/product info<br>altogether<br>8. Selectivity: at this moment<br>I want to do/see this<br>9. Variety<br>10. Entertainment/pastime/rel<br>axation/distraction<br>11. -<br>12. Reachability<br>13. Accessibility (universal)<br>14. Safety (of storage)<br>15. Easier to make contact<br>16. Keeping up to date<br>17. Faster availability of<br>products/services | Appropriation<br><br>(Benefits,<br>personal<br>meanings) |



|    |                              |                                                                                                                                                                                                                                                                                                                                                                                                                                                                                                                                                                                                                                                            |               |
|----|------------------------------|------------------------------------------------------------------------------------------------------------------------------------------------------------------------------------------------------------------------------------------------------------------------------------------------------------------------------------------------------------------------------------------------------------------------------------------------------------------------------------------------------------------------------------------------------------------------------------------------------------------------------------------------------------|---------------|
| AI | Nadelen online (ipv offline) | <ol style="list-style-type: none"> <li>1. No option to see/try out</li> <li>2. Less social/personal contact</li> <li>3. One does fewer offline activities</li> <li>4. Shipping costs/disadvantages of delivery-return</li> <li>5. Unfriendly messages/bullying</li> <li>6. Social pressure</li> <li>7. Less the experience of offline activities</li> <li>8. Privacy</li> <li>9. Manipulation, influence</li> <li>10. Addiction, occupy</li> <li>11. Working load/pressure</li> <li>12. Source mentioning, untruths</li> <li>13. Advertismment, (social) 'nonsense'</li> <li>14. Information overload</li> <li>15. Disappearance of local shops</li> </ol> |               |
| AJ | Estimation Internet skills   | <ol style="list-style-type: none"> <li>1. I'm not good with the Internet at all</li> <li>2. There are certain things I can do, but also things I'm having difficulties with</li> <li>3. I'm able to perform the necessary, but no more than that</li> <li>4. There are certainly things I can learn/more is possible, but I'll manage<br/>Er zijn zeker nog dingen die ik bij kan leren/er is meer mogelijk, maar ik red me prima</li> <li>5. I think I know the Internet pretty well, at this moment, no improvement is possible</li> </ol>                                                                                                               | Appropriation |

|    |                                 |                                                                                                                                                                                                                                                                                                                                                                                |               |
|----|---------------------------------|--------------------------------------------------------------------------------------------------------------------------------------------------------------------------------------------------------------------------------------------------------------------------------------------------------------------------------------------------------------------------------|---------------|
| AK | First device used               | <ol style="list-style-type: none"> <li>1. PC</li> <li>2. Laptop</li> <li>3. Tablet</li> <li>4. Other, namely:</li> </ol>                                                                                                                                                                                                                                                       | Appropriation |
| AL | Devices ever used               | <ol style="list-style-type: none"> <li>1. PC</li> <li>2. Laptop</li> <li>3. Tablet</li> <li>4. Smartphone</li> <li>5. Other, namely:</li> </ol>                                                                                                                                                                                                                                | Appropriation |
| AM | Devices currently in use        | <ol style="list-style-type: none"> <li>1. PC</li> <li>2. Laptop</li> <li>3. Tablet</li> <li>4. Smartphone</li> <li>5. Other, namely:</li> </ol>                                                                                                                                                                                                                                | Appropriation |
| AN | Devices owned                   | <ol style="list-style-type: none"> <li>1. We have shared ownership over all mentioned devices, we only have our own smartphones</li> <li>2. The laptop/tablet/pc is my own, the rest of the devices we share (own smartphone)</li> <li>3. We all have our own devices</li> <li>4. We also have some work-related devices at home</li> <li>5. All devices are my own</li> </ol> |               |
| AO | Purpose use of specific devices | <ol style="list-style-type: none"> <li>1. Practical in use, handy</li> <li>2. Easy to use for more complicated tasks, typing texts etc.</li> <li>3. Always at hand</li> <li>4. Devices are linked to work</li> <li>5. Larger screen</li> </ol>                                                                                                                                 | Appropriation |

|    |                                     |                                                                                                                                                                                                                                                                                                                                                                                                                                                                                                                           |               |
|----|-------------------------------------|---------------------------------------------------------------------------------------------------------------------------------------------------------------------------------------------------------------------------------------------------------------------------------------------------------------------------------------------------------------------------------------------------------------------------------------------------------------------------------------------------------------------------|---------------|
| AP | Future purchase                     | <ol style="list-style-type: none"> <li>1. When devices need replacement</li> <li>2. Solar panels with internet</li> <li>3. A fridge writing up the stock</li> <li>4. Future inventions that I don't know about yet</li> <li>5. A smart-tv (or Chromecast)</li> <li>6. I'm not planning to buy new devices</li> <li>7. Smart watch/sports watch</li> <li>8. Domotica that have to get further developed first</li> <li>9. I'm planning to buy a new smartphone</li> <li>10. I'm planning to buy my first tablet</li> </ol> | Appropriation |
| AQ | Important new devices               | <ol style="list-style-type: none"> <li>1. The latest model</li> <li>2. Price-quality ratio</li> <li>3. Specific functionalities/<br/>/up-to-date, f.e. image, sound, storage, reaction speed</li> <li>4. Brand</li> <li>5. Look of the device</li> <li>6. Easy to use</li> <li>7. Familiar device (f.e. device or operating system)</li> </ol>                                                                                                                                                                            |               |
| AR | Person who decides about new device | <ol style="list-style-type: none"> <li>1. Me</li> <li>2. My partner</li> <li>3. Us together</li> </ol>                                                                                                                                                                                                                                                                                                                                                                                                                    | Appropriation |
| AS | Purchasing process                  | <ol style="list-style-type: none"> <li>1. One's doing research, the other indicates requirements, final choice is made together</li> <li>2. I choose everything myself</li> <li>3. My partner chooses everything him/herself</li> <li>4. We go to the store together</li> </ol>                                                                                                                                                                                                                                           | Appropriation |

|    |                             |                                                                                                                                                                                                                                                                                                                                                                                                                                                                                         |                                                                                  |
|----|-----------------------------|-----------------------------------------------------------------------------------------------------------------------------------------------------------------------------------------------------------------------------------------------------------------------------------------------------------------------------------------------------------------------------------------------------------------------------------------------------------------------------------------|----------------------------------------------------------------------------------|
|    |                             | <ol style="list-style-type: none"> <li>5. We search for information/products on the internet, together</li> <li>6. I do some research online and order it online too</li> <li>7. I/we do some research online and then go to the store to buy the product</li> <li>8. I acquire ideas in stores and then seek for the best price on the Internet</li> <li>9. I/we ask expert(s) in our social circle or children for advice.</li> </ol>                                                 |                                                                                  |
| AT | Help w/ Internet            | <ol style="list-style-type: none"> <li>1. Yes, parents help children</li> <li>2. Yes, children help parents</li> <li>3. Yes, we mutually help each other</li> <li>4. No, not necessary</li> <li>5. There's one expert at home, who helps everyone</li> </ol>                                                                                                                                                                                                                            | <p>Learning – social capital</p> <p>(Appropriation, knowledge of technology)</p> |
| AU | Help w/ Internet externally | <ol style="list-style-type: none"> <li>1. We do get help of a friend/acquaintance/family member/colleague sometimes who knows a lot about the Internet</li> <li>2. We sometimes ask for help instore, such as the MediaMarkt</li> <li>3. No, we never seek for help externally, we'll manage ourselves internet</li> <li>4. No we never get help of other, because we don't know experts</li> <li>5. I'm not really seeking for help, but sometimes I have sparring partners</li> </ol> | <p>Learning – social capital</p> <p>(Appropriation, knowledge of technology)</p> |
| AV | Things to learn             | <ol style="list-style-type: none"> <li>1. Yes, more about user portals</li> <li>2. Yes, more about programming/ the back-end</li> <li>3. Yes, more about online influence</li> <li>4. No, not at this moment</li> <li>5. Yes, in general new developments</li> </ol>                                                                                                                                                                                                                    |                                                                                  |

---

|  |  |                                     |  |
|--|--|-------------------------------------|--|
|  |  | 6. Foto- and videoediting           |  |
|  |  | 7. Yes, a specific program for work |  |

---



---

|    |                       |                             |  |
|----|-----------------------|-----------------------------|--|
| AW | How to implement help | 1. Have others carry it out |  |
|    |                       | 2. To learn myself          |  |

---



---

### **Incorporation (B)**

---

|    |                                            |                                             |               |
|----|--------------------------------------------|---------------------------------------------|---------------|
| BA | Online: replacement or addition of offline | 1. Replacement                              | Incorporation |
|    |                                            | 2. Addition                                 |               |
|    |                                            | 3. Partially replacement, but also addition |               |

---

|    |                      |                                                                                                                                                                          |               |
|----|----------------------|--------------------------------------------------------------------------------------------------------------------------------------------------------------------------|---------------|
| BC | Pattern Internet use | 1. Yes, in the morning I always check standard things (notifications, the news, weather, e-mails, social media), during the day and in the evenings it's more relaxation | Incorporation |
|    |                      | 2. Yes, only in the mornings. Daarna loopt alles door elkaar, wanneer ik er behoefte aan heb.                                                                            |               |
|    |                      | 3. No, during the day there is no fixed pattern. When I feel the need to or I have time (at work continuous).                                                            |               |

---

|    |                                            |                                                                                      |               |
|----|--------------------------------------------|--------------------------------------------------------------------------------------|---------------|
| BD | Daily routines not possible w/out internet | 1. Work, at home everything is still possible (but will become more difficult)       | Incorporation |
|    |                                            | 2. Both work and private everything is still possible, but it might become difficult |               |
|    |                                            | 3. In general I can't do without the Internet anymore                                |               |

---

|    |                                  |                                                                                                                                                                                                                                                                                                                                                                                                                                                                                                                                                                                              |                           |
|----|----------------------------------|----------------------------------------------------------------------------------------------------------------------------------------------------------------------------------------------------------------------------------------------------------------------------------------------------------------------------------------------------------------------------------------------------------------------------------------------------------------------------------------------------------------------------------------------------------------------------------------------|---------------------------|
|    |                                  | <ul style="list-style-type: none"> <li>4. Work is impossible without internet. In private spheres I could do without, but I don't want to</li> <li>5. Bepaalde zaken in het privéleven niet, zoals internetbellen op afstand, e-mailen</li> <li>6. In het algemeen wil ik niet meer zonder internet</li> </ul>                                                                                                                                                                                                                                                                               |                           |
| BE | Importance Internet spare time   | <ul style="list-style-type: none"> <li>1. Yes, it is important. Nowadays, most of my entertainment takes place on the Internet.</li> <li>2. Yes, for some part the Internet is important for my spare time. But I still do a lot offline entertainment as well.</li> <li>3. No, the Internet is not important for my spare time. I manage offline.</li> </ul>                                                                                                                                                                                                                                | Incorporation             |
| BF | Influence Internet on spare time | <ul style="list-style-type: none"> <li>1. Only positive: there are many more ways of entertainment and information gathering, everything is findable.</li> <li>2. Only negative: one : people tend to see and talk to each other much less. Sometimes the social interaction is being disturbed.</li> <li>3. Both positive as negative: information gathering is broader and easier, but less qualitative contact. Also, negative developments such as online bullying.</li> <li>4. Both positive and negative, but in everything there's something negative. So mostly positive.</li> </ul> | Incorporation<br>Benefits |
| BG | Rules family                     | <ul style="list-style-type: none"> <li>1. We use fixed times/controlled limitation of screen time for the children</li> </ul>                                                                                                                                                                                                                                                                                                                                                                                                                                                                | Incorporation             |

|    |                              |                                                                                                                                                                                                                                                                                                                                                                                                                                                                                                                                                                         |                                                   |
|----|------------------------------|-------------------------------------------------------------------------------------------------------------------------------------------------------------------------------------------------------------------------------------------------------------------------------------------------------------------------------------------------------------------------------------------------------------------------------------------------------------------------------------------------------------------------------------------------------------------------|---------------------------------------------------|
|    |                              | <ol style="list-style-type: none"> <li>2. We use a fixed type of internet use for the children</li> <li>3. There are no rules for the children. They are old enough, it's their own responsibility</li> <li>4. There are no rules at home, it is not needed.</li> <li>5. There are no rules yet, because the children are too young, but in the future we will definitely set rules.</li> <li>6. There are a few specific rules: no phones/internet during dinner, for example.</li> <li>7. We used to have some rules, but now the children are old enough.</li> </ol> | (regulation, parental mediation)                  |
| BH | Monitoring children          | <ol style="list-style-type: none"> <li>1. Yes, regularly. Because I noticed something before that I did not like.</li> <li>2. Yes, regularly. Out of precaution.</li> <li>3. I don't, because outside of the home I can't control what they're doing either.</li> <li>4. No, we don't do that anymore. We used to do so when the children were young.</li> </ol>                                                                                                                                                                                                        | Incorporation<br>(regulation, parental mediation) |
| BI | Influence interaction family | <ol style="list-style-type: none"> <li>1. Yes, the internet facilitates. We now communicate a lot more while we are away from each other.</li> <li>2. It disturbs the contact. We interact a lot less when we are together.</li> <li>3. It annoys, just because of the great accessibility it irritates when someone doesn't respond</li> <li>4. The internet doesn't influence contact between family members.</li> </ol>                                                                                                                                              | Incorporation                                     |

|                            |                                                    |                                                                                                                                                                                                                                                                                                                                                                                                                                                             |                                                  |
|----------------------------|----------------------------------------------------|-------------------------------------------------------------------------------------------------------------------------------------------------------------------------------------------------------------------------------------------------------------------------------------------------------------------------------------------------------------------------------------------------------------------------------------------------------------|--------------------------------------------------|
| BJ                         | Internet use upbringing                            | <ol style="list-style-type: none"> <li>1. Yes, we do use educational games and movie clips.</li> <li>2. Yes, to search for information about upbringing.</li> <li>3. Yes, as occupation for the children. Not necessarily educational.</li> <li>4. No, we don't use the Internet for upbringing the children.</li> </ol>                                                                                                                                    | Incorporation                                    |
| BK                         | Problem without Internet                           | <ol style="list-style-type: none"> <li>1. Yes, concerning work, I would have a problem. For my private life I wouldn't (except for transactions).</li> <li>2. Yes, I would have a problem both for work as well as for private life.</li> <li>3. No, I wouldn't have a problem at all.</li> <li>4. For work I wouldn't have a problem. For private life I would.</li> <li>5. A problem, not really. We will find a solution for everything again</li> </ol> | Incorporation<br>(invloed op<br>dagelijks leven) |
| <b>Objectification (C)</b> |                                                    |                                                                                                                                                                                                                                                                                                                                                                                                                                                             |                                                  |
| CA                         | Internet use spaces in the home                    | <ol style="list-style-type: none"> <li>1. Everywhere</li> <li>2. Study/computer room/office</li> <li>3. Living room</li> <li>4. Kitchen(table)</li> <li>5. Bedroom</li> <li>6. Toilet</li> <li>7. Bathroom</li> <li>8. Garden</li> <li>9. Attic</li> </ol>                                                                                                                                                                                                  | Objectification                                  |
| CB                         | Reasoning Internet use specific spaces in the home | <ol style="list-style-type: none"> <li>1. Quiet, calm</li> <li>2. Spacious (easy to work)</li> <li>3. Everything at hand (f.e. administration)</li> <li>4. Use connected to space/area, such as recipes in the kitchen</li> <li>5. Cosiness</li> <li>6. Throughout the house, doesn't matter where</li> <li>7. Comfortable</li> </ol>                                                                                                                       |                                                  |



|    |                                       |                                                                                                                                                                                                                                                                                                                                                                                                                                                                  |                 |
|----|---------------------------------------|------------------------------------------------------------------------------------------------------------------------------------------------------------------------------------------------------------------------------------------------------------------------------------------------------------------------------------------------------------------------------------------------------------------------------------------------------------------|-----------------|
| CC | Which devices outside of the home     | <ol style="list-style-type: none"> <li>1. Yes, the tablet</li> <li>2. Yes, the laptop</li> <li>3. None</li> <li>4. Yes, the e-reader</li> </ol>                                                                                                                                                                                                                                                                                                                  | Objectification |
| CD | Reasoning devices outside of the home | <ol style="list-style-type: none"> <li>1. On holiday, to do daily tasks and for entertainment</li> <li>2. To be able to perform everyday tasks outside of the home</li> <li>3. To entertain the children</li> <li>4. To be able to work on the way</li> <li>5. Except for the smartphone no devices outdoors, not practical</li> <li>6. To do specific things outside of the home, such as searching for restaurants, parking via an app, navigation.</li> </ol> | Objectification |

---

### Conversion (D)

---

|    |                           |                                                                                                                                                                                                                                                                                                                                                                                                                                                                                                                                                                                                   |            |
|----|---------------------------|---------------------------------------------------------------------------------------------------------------------------------------------------------------------------------------------------------------------------------------------------------------------------------------------------------------------------------------------------------------------------------------------------------------------------------------------------------------------------------------------------------------------------------------------------------------------------------------------------|------------|
| DA | Changed functions devices | <ol style="list-style-type: none"> <li>1. Yes, my smartphone changed in function. First I used it mainly for calling, now the number of apps still increases.</li> <li>2. I use a certain device less than before (for example because the smartphone took over functions)</li> <li>3. I use a certain device less than before, because it couldn't offer me what I had hoped.</li> <li>4. No, no changes</li> <li>5. I now use the smart TV for several things, because it has more options</li> <li>6. Tablet took over functions.</li> <li>7. All devices have increased in usages.</li> </ol> | Conversion |
| DC | Meaning Internet (use)    | <ol style="list-style-type: none"> <li>1. All-encompassing. Important for both daily life as private life and I can't live without anymore.</li> </ol>                                                                                                                                                                                                                                                                                                                                                                                                                                            | Conversion |

---

|    |                                    |                                                                                                                                                                                                                                                                                                                                                                                                                                                                                                                       |                                       |
|----|------------------------------------|-----------------------------------------------------------------------------------------------------------------------------------------------------------------------------------------------------------------------------------------------------------------------------------------------------------------------------------------------------------------------------------------------------------------------------------------------------------------------------------------------------------------------|---------------------------------------|
|    |                                    | <ol style="list-style-type: none"> <li>2. It is very important, both for work and for private life, I could live without if necessary, but the loss would be big</li> <li>3. It has become a necessary evil, I would rather live without</li> <li>4. It is a useful tool when it works. If not, I'd rather have it gone.</li> <li>5. I prefer to stay away from the internet</li> <li>6. It is a useful tool, it makes life easier, but sometimes I prefer life without Internet.</li> </ol>                          |                                       |
| DD | Matter of course                   | <ol style="list-style-type: none"> <li>1. It is a matter of course to use the Internet, there's nothing that 'feels new' anymore</li> <li>2. It is a matter of course to use the Internet, but with every new app I need to discover/learn new things</li> <li>3. It doesn't come naturally to use the Internet, I really have to use it consciously and only for necessary things</li> </ol>                                                                                                                         | Conversion                            |
| DE | Conversations about Internet (use) | <ol style="list-style-type: none"> <li>1. Yes, but only casually/incidental, about content I've seen online</li> <li>2. Yes, I sometimes point it out when I find it annoying that somebody's on his/her smartphone a lot. So about the negative, social consequences.</li> <li>3. Yes, internet related. For example about a new provider.</li> <li>4. No, never.</li> <li>5. Yes, about the threats of the Internet.</li> <li>6. Yes, work related</li> <li>7. Yes, to discuss internet related problem.</li> </ol> | Conversion (ownership and competence) |

|    |                     |                                                                                                                                      |
|----|---------------------|--------------------------------------------------------------------------------------------------------------------------------------|
| DF | Phenomenon Internet | <ol style="list-style-type: none"> <li>1. Purely positive</li> <li>2. Mostly positive, but there are also negative sides.</li> </ol> |
|----|---------------------|--------------------------------------------------------------------------------------------------------------------------------------|

---

**No specific question or phase (E)**

---

|    |               |                                                                                                                                                                                                                                                                                                                                                                                                                     |
|----|---------------|---------------------------------------------------------------------------------------------------------------------------------------------------------------------------------------------------------------------------------------------------------------------------------------------------------------------------------------------------------------------------------------------------------------------|
| EA | Trust/privacy | <ol style="list-style-type: none"> <li>1. I don't worry about privacy at all. I easily fill out personal information.</li> <li>2. I fill out almost everything, but I know I should be more critical.</li> <li>3. I still distrust the Internet a lot, I don't have the full confidence yet.</li> <li>4. Because we became threatened (f.e. phishing), we are now more critical/distrusting than before.</li> </ol> |
|----|---------------|---------------------------------------------------------------------------------------------------------------------------------------------------------------------------------------------------------------------------------------------------------------------------------------------------------------------------------------------------------------------------------------------------------------------|

---
